# Supplementary material for: Regulation of β-Disaccharide Accumulation by β-Glucosidase Inhibitors to Enhance Cellulase Production in Trichoderma reesei
Source: MDPI journal article supplement (doi:10.3390/fermentation8050232), 2022-05-17
Supplement: s1 [file s1]

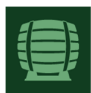**Table S1.** Primers for the qRT-PCR analysis.

| Gene        |    | Sequence                        |
|-------------|----|---------------------------------|
| <i>sar1</i> | -F | 5'-CGTCTTGTCGTCTTTGGGTCT-3'     |
|             | -R | 5'-GGATAGCAACTCGGTCGTTCTT-3'    |
| <i>cbh1</i> | -F | 5'-ACGAGTTCTCTTTTCGATGTTGATG-3' |
|             | -R | 5'-CGGTGTTGGTGGGATACTTG-3'      |
| <i>bgl1</i> | -F | 5'-CCGAGTGATCTGTTCCAGAATGT-3'   |
|             | -R | 5'-CTGGGTGCTGAAGATGGGTAG-3'     |
| <i>xyl1</i> | -F | 5'-CCATCAACCTTCTAGACGAC-3'      |
|             | -R | 5'-AACCCTGCAGGAGATAGAC-3'       |
